# Supplementary material for: Modeling HER2 Effects on Cell Behavior from Mass Spectrometry Phosphotyrosine Data
Source: PLOS journal article supplement (doi:10.1371/journal.pcbi.0030004), 2006-12-29
Supplement: S1 (10.1371/journal.pcbi.0030004.s001) [file journal.pcbi.0030004.s001]

**Table S1**

| **Phosphorylation Site**  **(P→24H, SF)** | **Measurement**  **Type** |
| --- | --- |
| p130Cas Y 327 | 10 minutes |
| p130Cas Y 327 | 30 minutes |
| PRP4K Y 849 | 30 minutes |
| PTPRA Y 798 | 30 minutes |
| p130Cas Y 387 | 10 minutes |
| PTPRA Y 798 | 5 minutes |
| PTPRA Y 798 | 10 minutes |
| PI3KR2 Y 464 | 30 minutes |
| p130Cas Y 234 | 10 minutes |
| EphA2 Y/Y 588/594 | 5 minutes |
| SHP-2 Y 62 | 5 minutes |
| SHP-2 Y 62 | 10 minutes |
| PRP4K Y 849 | 5 minutes |
| SHP-2 Y 62 | 30 minutes |
| EphA2 Y 575 | 10 minutes |
| HER2 Y 1248 | 30 minutes |
| EphA2 Y 588 | 30 minutes |
| LDLR Y 845 | 30 minutes |
| p130Cas Y 387 | 30 minutes |
| LDLR Y 845 | 5 minutes |
